# Supplementary material
Source: publisher figshare collection journal article supplement (https://acs.figshare.com/ndownloader/files/18840527)
Supplement: Supplementary file 1 [file 18840527]

# Supporting Information

## Sensitive and Site-Selective Determination of Phosphorylated Peptides with a Ratiometric Photoelectrochemical Strategy

Baihe Fu, Zhonghai Zhang\*

Shanghai Key Laboratory of Green Chemistry and Chemical Processes, School of Chemistry and Molecular Engineering, East China Normal University, Shanghai 200241, China

Address correspondence to [zhzhang@chem.ecnu.edu.cn](mailto:zhzhang@chem.ecnu.edu.cn)

### I. Experimental Section

*Chemicals and materials*

*Preparation of TiO<sub>2</sub> nanowires (r-TiO<sub>2</sub> NWs) and TiO<sub>2</sub> nanotubes (a-TiO<sub>2</sub> NTs)*

*Materials Characterization*

*Photoelectrochemical measurements*

*Real samples detection*

### II. Additional Figure S1-S10

**Figure S1.** Diffuse reflectance spectra of absorbance of (a) r-TiO<sub>2</sub> NWs and (b) a-TiO<sub>2</sub> NTs.

**Figure S2.** Raman spectra of (a) r-TiO<sub>2</sub> NWs and (b) a-TiO<sub>2</sub> NTs.

**Figure S3.** (a) Top-view SEM image; (b) TEM image; (c) cross-sectional SEM image; (d) high magnification of cross-sectional SEM image; closer observation of high resolution of top-view SEM image.

**Figure S4.** (a) Top-view SEM image; (b-d) TEM images; (e) cross-sectional SEM image.

**Figure S5.** FTIR spectroscopy of (a) r-TiO<sub>2</sub> NWs, peptide/r-TiO<sub>2</sub> NWs, phosphopeptide/r-TiO<sub>2</sub> NWs; (b) a-TiO<sub>2</sub> NTs, peptide/a-TiO<sub>2</sub> NTs, phosphopeptide/a-TiO<sub>2</sub> NTs.

**Figure S6.** Amperometric transient photocurrent vs time plots of (a) r-TiO<sub>2</sub> NWs and (b) a-TiO<sub>2</sub> NTs at applied potential of 0.5 V vs Ag/AgCl under illumination of simulated solar light with different concentrations of phosphopeptides.

**Figure S7.** PEC responses of (a1) BSA, (a2) human serum, and (a3) skim milk on r-TiO<sub>2</sub> NWs, and of (b1) BSA, (b2) human serum, and (b3) skim milk on a-TiO<sub>2</sub> NTs.

**Figure S8.** XPS survey of nonphosphopeptide/r-TiO<sub>2</sub> NWs.

**Figure S9.** Core-level XPS of N 1s on phosphopeptide/r-TiO<sub>2</sub> NWs.

**Figure S10.** (a) Electrochemical impedance spectra of Nyquist plots of a-TiO<sub>2</sub> NTs and phosphopeptide/a-TiO<sub>2</sub> NTs, (b) Mott-Schottky plots of a-TiO<sub>2</sub> NTs and phosphopeptide/a-TiO<sub>2</sub> NTs.

### III. Additional References

## I. Experimental Section

**Chemicals and Materials.** Fluorine-doped-tin-oxide (FTO) glass ( $50 \times 10 \text{ mm}^2$ ) was supplied from Kaivo Optoelectronic Technology Co., Ltd, Zhuhai, China. The thickness of titanium foil was 0.1 mm (99.6%, Jinjia Metal, China). Hydrochloric (HCl), isopropyl titanate, acetic acid, acetic sodium, ethylene glycol (EG) and ammonia fluoride ( $\text{NH}_4\text{F}$ ) were purchased from Macklin Chemical and used as received. The peptides were synthesized and purified by ChinaPeptides Co., Ltd. (Shanghai, China). The sequences are listed below:

Phosphopeptide: GG(p-S)GGTGGY, GGS GG(p-T)GGY, GGS GGTGG(p-Y), D(p-S)GEGDFLAEGGGVR

Nonphosphopeptide: GGS GGTGGY, DSGEGDFLAEGGGVR

All aqueous solutions were prepared using deionized water (DI) with a resistivity of  $18.2 \text{ M}\Omega \text{ cm}$ .

**Preparation of  $\text{TiO}_2$  nanowires.** The synthesis of FTO- $\text{TiO}_2$  nanowires was carried out in a 25 mL Teflon-lined stainless steel autoclave. In a typical procedure, 10 mL HCl were dissolved in 10 mL DI water. After stirring for 10 min, 0.5 mL of isopropyl titanate were added into the mixture. The mixture was transferred into the Teflon-lined stainless steel autoclave and maintained at  $150^\circ\text{C}$  for 12 h. Finally, the autoclave was cooled down to room temperature. The FTO glass was covered with white  $\text{TiO}_2$  nanowires and washed with DI water for several times. The as-prepared  $\text{TiO}_2$  nanowires were annealed in air at  $500^\circ\text{C}$  for 1 h to increase the degree of crystallinity.

**Preparation of  $\text{TiO}_2$  nanotubes.** The  $\text{TiO}_2$  nanotubes were fabricated by a two-step anodization process. Prior to anodization, the Ti foils were first degreased by sonicating orderly in acetone, ethanol and DI water, followed by drying in pure nitrogen stream. The anodization was carried out using a conventional two-electrode system with the Ti foil as an anode and a Pt foil as a cathode respectively. All electrolytes consisted of 0.32 wt%  $\text{NH}_4\text{F}$  in EG solution with 2.7 vol% water. All the anodization was carried out in room temperature. In the anodization, the Ti foil was first anodized at 60 V for 0.5 h, and then the as-grown nanotube layer was ultrasonically removed in deionized water. Then after drying in pure nitrogen, the Ti foil was second anodized at 30 V for 0.5 h. The as-prepared  $\text{TiO}_2$  nanotube samples were cleaned with DI water and dried off with nitrogen gas. The as-prepared  $\text{TiO}_2$  nanotubes were annealed in air at  $500^\circ\text{C}$  for 1 h to increase the degree of crystallinity.

**Material Characterizations.** The microscopic morphologies of photoelectrode were characterized by scanning electron microscopy (SEM; Hitachi S4800) and high resolution transmission electron microscopy (HRTEM, JEOL JEM 2100). The crystalline structure was analyzed by X-ray diffraction (XRD) (Bruker D8 Discover diffractometer, using  $\text{Cu K}\alpha$  radiation ( $1.540598 \text{ \AA}$ )). Selective adsorption of phosphopeptide was measured from Fourier transform infrared (FTIR) spectroscopy (Nicolet, S50) and X-ray photoelectron spectroscopy (XPS, Kratos Analytical). The diffuse reflectance UV-vis adsorption spectra were recorded on a spectrophotometer (Shimadzu, UV 3600), with fine  $\text{BaSO}_4$  powder as reference. The Raman spectra were measured through DXR Raman Microscope (Thermo).

**Photoelectrochemical measurements.** All the photoelectrochemical measurements were performed with CHI 660E electrochemical working station in a three-electrode system with r-TiO<sub>2</sub> NWs and a-TiO<sub>2</sub> NTs electrode as working electrode, a platinum foil as the counter electrode, and Ag/AgCl with saturated KCl solution as the reference electrode. Before measurements, the TiO<sub>2</sub> photoelectrodes were incubated in phosphopeptide and nonphosphopeptide solution at 37 °C for 30 min. The supporting electrolyte was HAc-NaAc (pH = 6.2) solution. The transient photoresponse was evaluated under simulated sunlight irradiation (light on/off cycles: 60 s) at a fixed electrode potential of 0.5 V vs Ag/AgCl. The electrochemical impedance spectra (EIS) were measured using a PGSTAT 302N Autolab Potentiostat/Galvanostat (Metrohm) equipped with a frequency-analyzer module (FRA2) with an excitation signal of 10 mV amplitude. Lighting apparatus used in the experiment is simulated solar light irradiation (100 mW cm<sup>-2</sup>) (PLS-sxe300).

**Real samples detection.** Bovine serum albumin (BSA) were dissolved in a solution of ammonium bicarbonate (50 mM, pH ~ 10) with a final concentration of 20 µg µL<sup>-1</sup>, followed by digestion with trypsin. The mixture with a concentration ratio of 50:1 (protein versus trypsin) was incubated in a 37 °C water bath for 24 h. For skim milk, 30 µL of the sample was diluted in 970 µL of 50 mM NH<sub>4</sub>HCO<sub>3</sub> aqueous solution. The mixed solution was centrifuged at 14000 rpm for 25 min to remove precipitate. The supernatant was denatured at 100 °C for 5 min and then was mixed with 30 µg of trypsin to incubate at 37 °C for 20 h. Human plasma (250 µL plasma in 750 µL ultrapure water) and vortexed at 25 °C for 1 h.

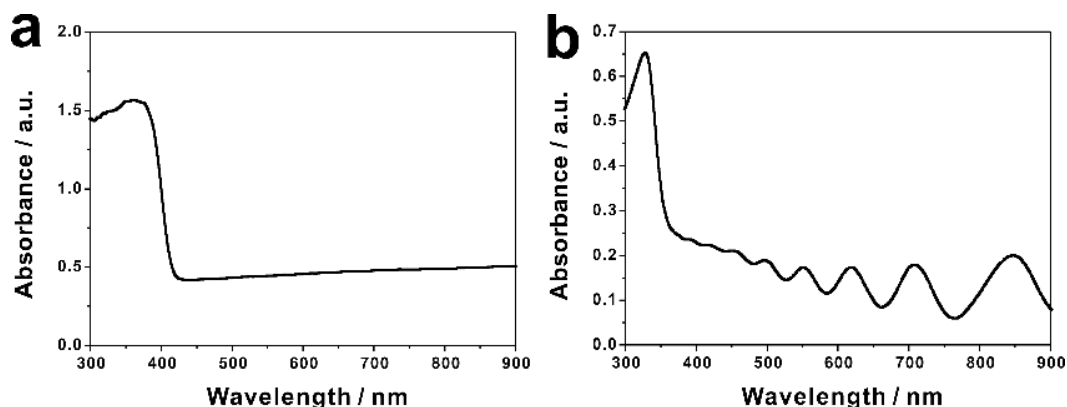

**Figure S1.** Diffuse reflectance spectra of absorbance of (a) r-TiO<sub>2</sub> NWs and (b) a-TiO<sub>2</sub> NTs.

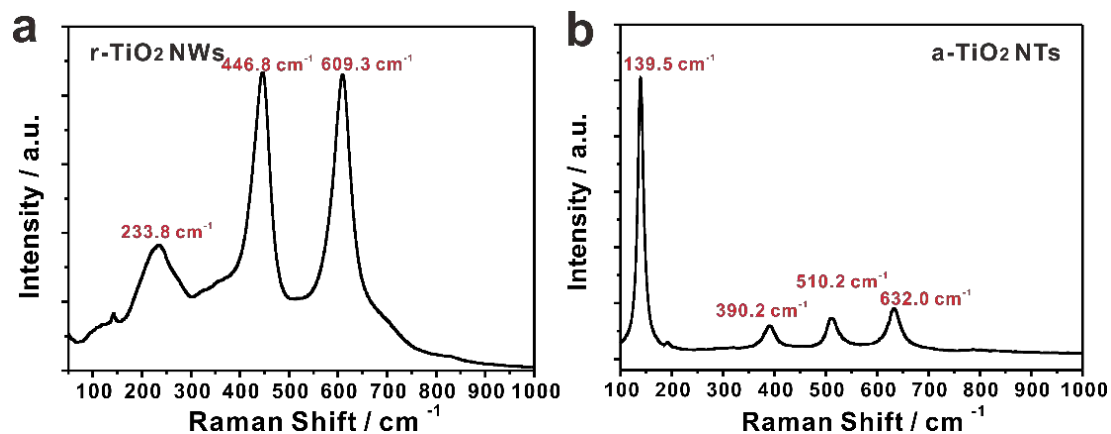

**Figure S2.** Raman spectra of (a) r-TiO<sub>2</sub> NWs and (b) a-TiO<sub>2</sub> NTs.

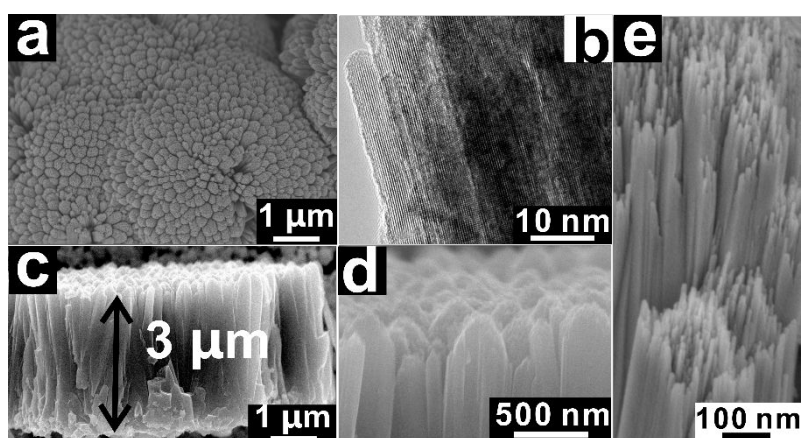

**Figure S3.** (a) Top-view SEM image; (b) TEM image; (c) cross-sectional SEM image; (d) high magnification of cross-sectional SEM image; (e) closer observation of high resolution of top-view SEM image.

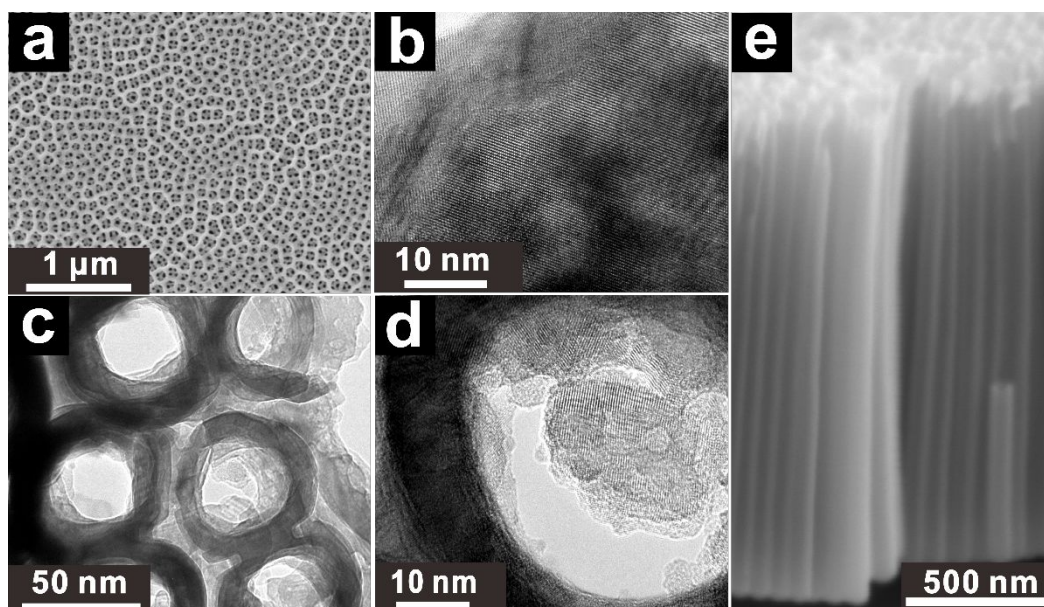

**Figure S4.** (a) Top-view SEM image; (b-d) TEM images; (e) cross-sectional SEM image.

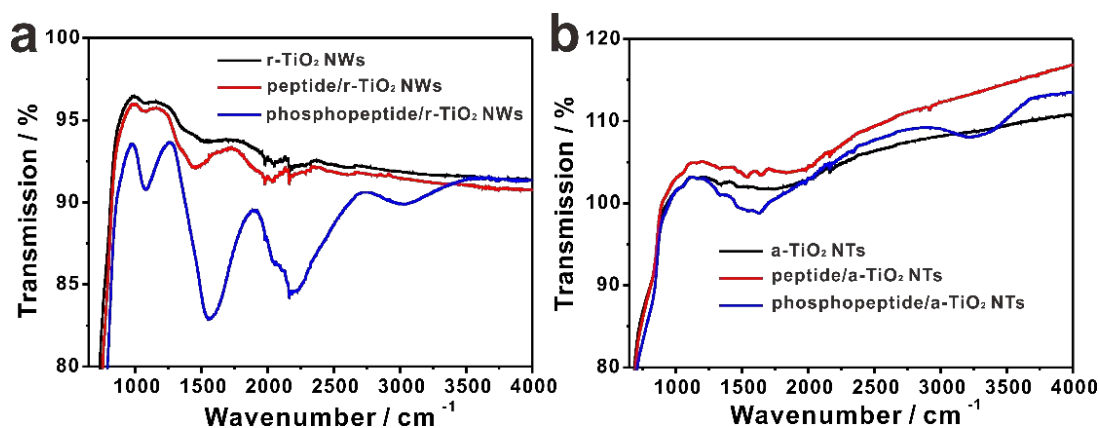

**Figure S5.** FTIR spectroscopy of (a) r-TiO<sub>2</sub> NWs, peptide/r-TiO<sub>2</sub> NWs, phosphopeptide/r-TiO<sub>2</sub> NWs; (b) a-TiO<sub>2</sub> NTs, peptide/a-TiO<sub>2</sub> NTs, phosphopeptide/a-TiO<sub>2</sub> NTs.

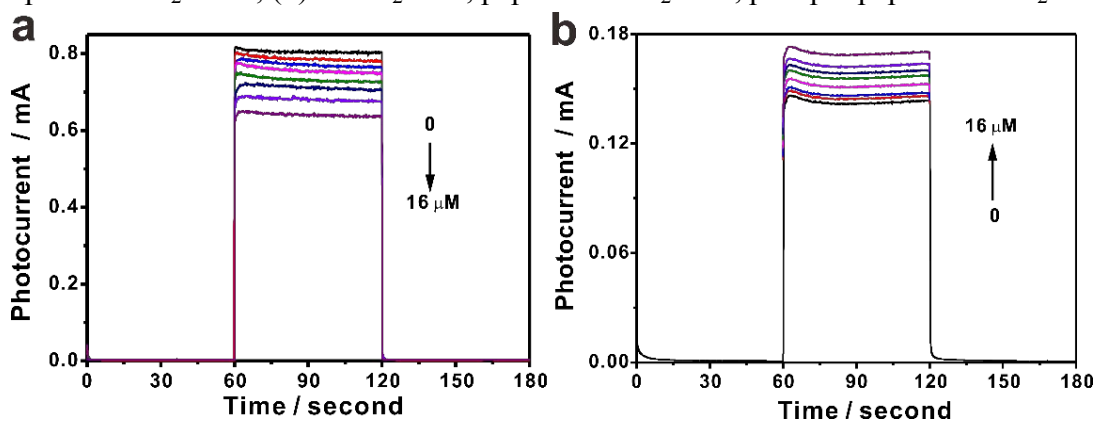

**Figure S6.** Amperometric transient photocurrent vs time plots of (a) r-TiO<sub>2</sub> NWs and (b) a-TiO<sub>2</sub> NTs at applied potential of 0.5 V vs Ag/AgCl under illumination of simulated solar light with different concentrations of phosphopeptides.

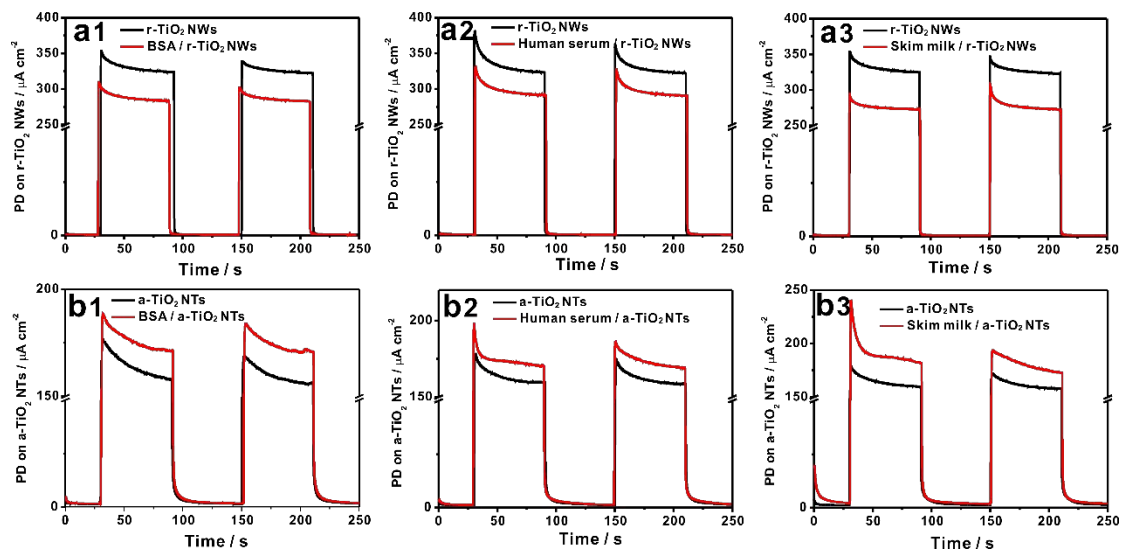

**Figure S7.** PEC responses of (a1) BSA, (a2) human serum, and (a3) skim milk on r-TiO<sub>2</sub> NWs, and of (b1) BSA, (b2) human serum, and (b3) skim milk on a-TiO<sub>2</sub> NTs.



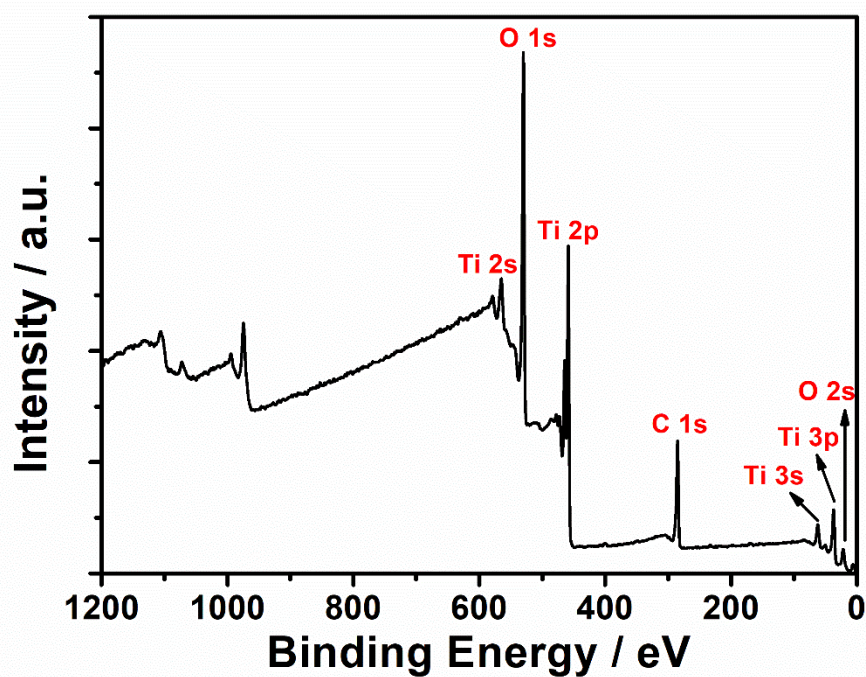

**Figure S8.** XPS survey of nonphosphopeptide/r-TiO<sub>2</sub> NWs.

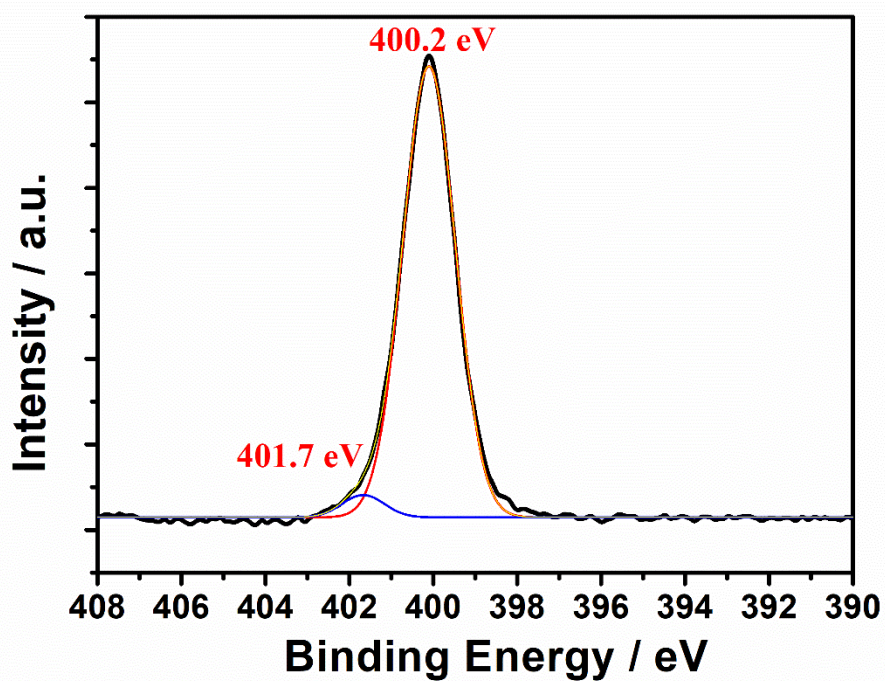

**Figure S9.** Core-level XPS of N 1s on phosphopeptide/r-TiO<sub>2</sub> NWs.

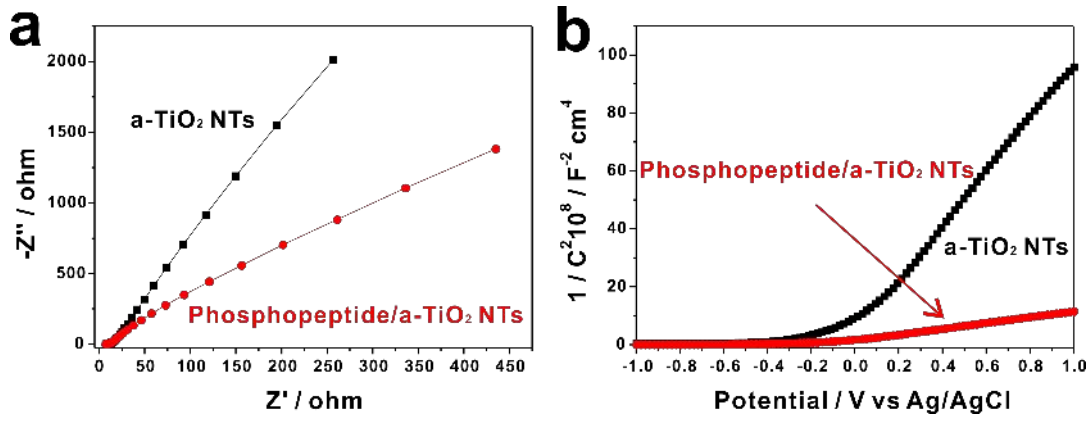

**Figure S10.** (a) Electrochemical impedance spectra of Nyquist plots of a-TiO<sub>2</sub> NTs and phosphopeptide/a-TiO<sub>2</sub> NTs, (b) Mott-Schottky plots of a-TiO<sub>2</sub> NTs and phosphopeptide/a-TiO<sub>2</sub> NTs.

The electrochemical impedance spectrum (EIS) is a powerful tool to study the interfacial properties of photoelectrodes. The Nyquist plots of EIS of a-TiO<sub>2</sub> NTs and phosphopeptide/a-TiO<sub>2</sub> NTs are presented in Figure S9a. After adsorption of phosphopeptides, the phosphopeptide/a-TiO<sub>2</sub> NTs sample showed much smaller semicircle diameter than the pristine a-TiO<sub>2</sub> NTs sample, indicated its smaller charge transfer resistance and faster electron mobility. In addition, the capacitance measurement on the electrode/electrolyte was also conducted to determine their carrier density ( $N_D$ ) following the equation below:<sup>1</sup>

$$\frac{1}{C^2} = \frac{2}{N_D e \epsilon_0 \epsilon} \left[ (U_S - U_{FB}) - \frac{k_B T}{e} \right] \quad (1)$$

where  $C$  is the space charge capacitance in the semiconductor;  $N_D$  is the electron carrier density;  $e$  is the elemental charge value;  $\epsilon_0$  is the permittivity of the vacuum;  $\epsilon$  is the relative permittivity of the semiconductor;  $U_S$  is the applied potential;  $T$  is temperature; and  $k_B$  is the Boltzmann constant. The carrier density  $N_D$  was determined from the Mott-Schottky (MS) plots as  $1/C^2$  vs potential in Figure S9b using the following equation:

$$N_D = - \left( \frac{2}{e \epsilon \epsilon_0} \right) \left( \frac{d(1/C^2)}{d(U_S)} \right)^{-1} \quad (2)$$

with  $e = 1.6 \times 10^{19}$ ,  $\varepsilon_0 = 8.86 \times 10^{-12}$  F/m, and  $\varepsilon = 48$  for anatase  $\text{TiO}_2$ . The calculate donor densities are  $4.9 \times 10^{17}$ , and  $7.5 \times 10^{18} \text{ cm}^{-3}$  for a- $\text{TiO}_2$  NTs and phosphopeptide/a- $\text{TiO}_2$  NTs respectively. The significantly increased  $N_D$  revealed that the phosphate anion doping improved the electrical conductivity, and thus accelerated the electron transfer.

## II. Additional References

- 1 Wang, G.; Wang, Q.; Lu, W.; Li, J. *J. Phys. Chem. B* **2006**, *110*, 22029.
- 2 Ghosh, P. K.; Azimi, M. E. *IEEE Trans. Dielectr. Electr. Insul.* **1994**, *1*, 975.
